# Supplementary material for: Loss of HIF-1α in natural killer cells inhibits tumour growth by stimulating non-productive angiogenesis
Source: PubMed Central journal article supplement (PMC5694012; doi:10.1038/s41467-017-01599-w), 2017-11-17
Supplement: 41467_2017_1599_MOESM1_ESM.pdf [file 41467_2017_1599_MOESM1_ESM.pdf]

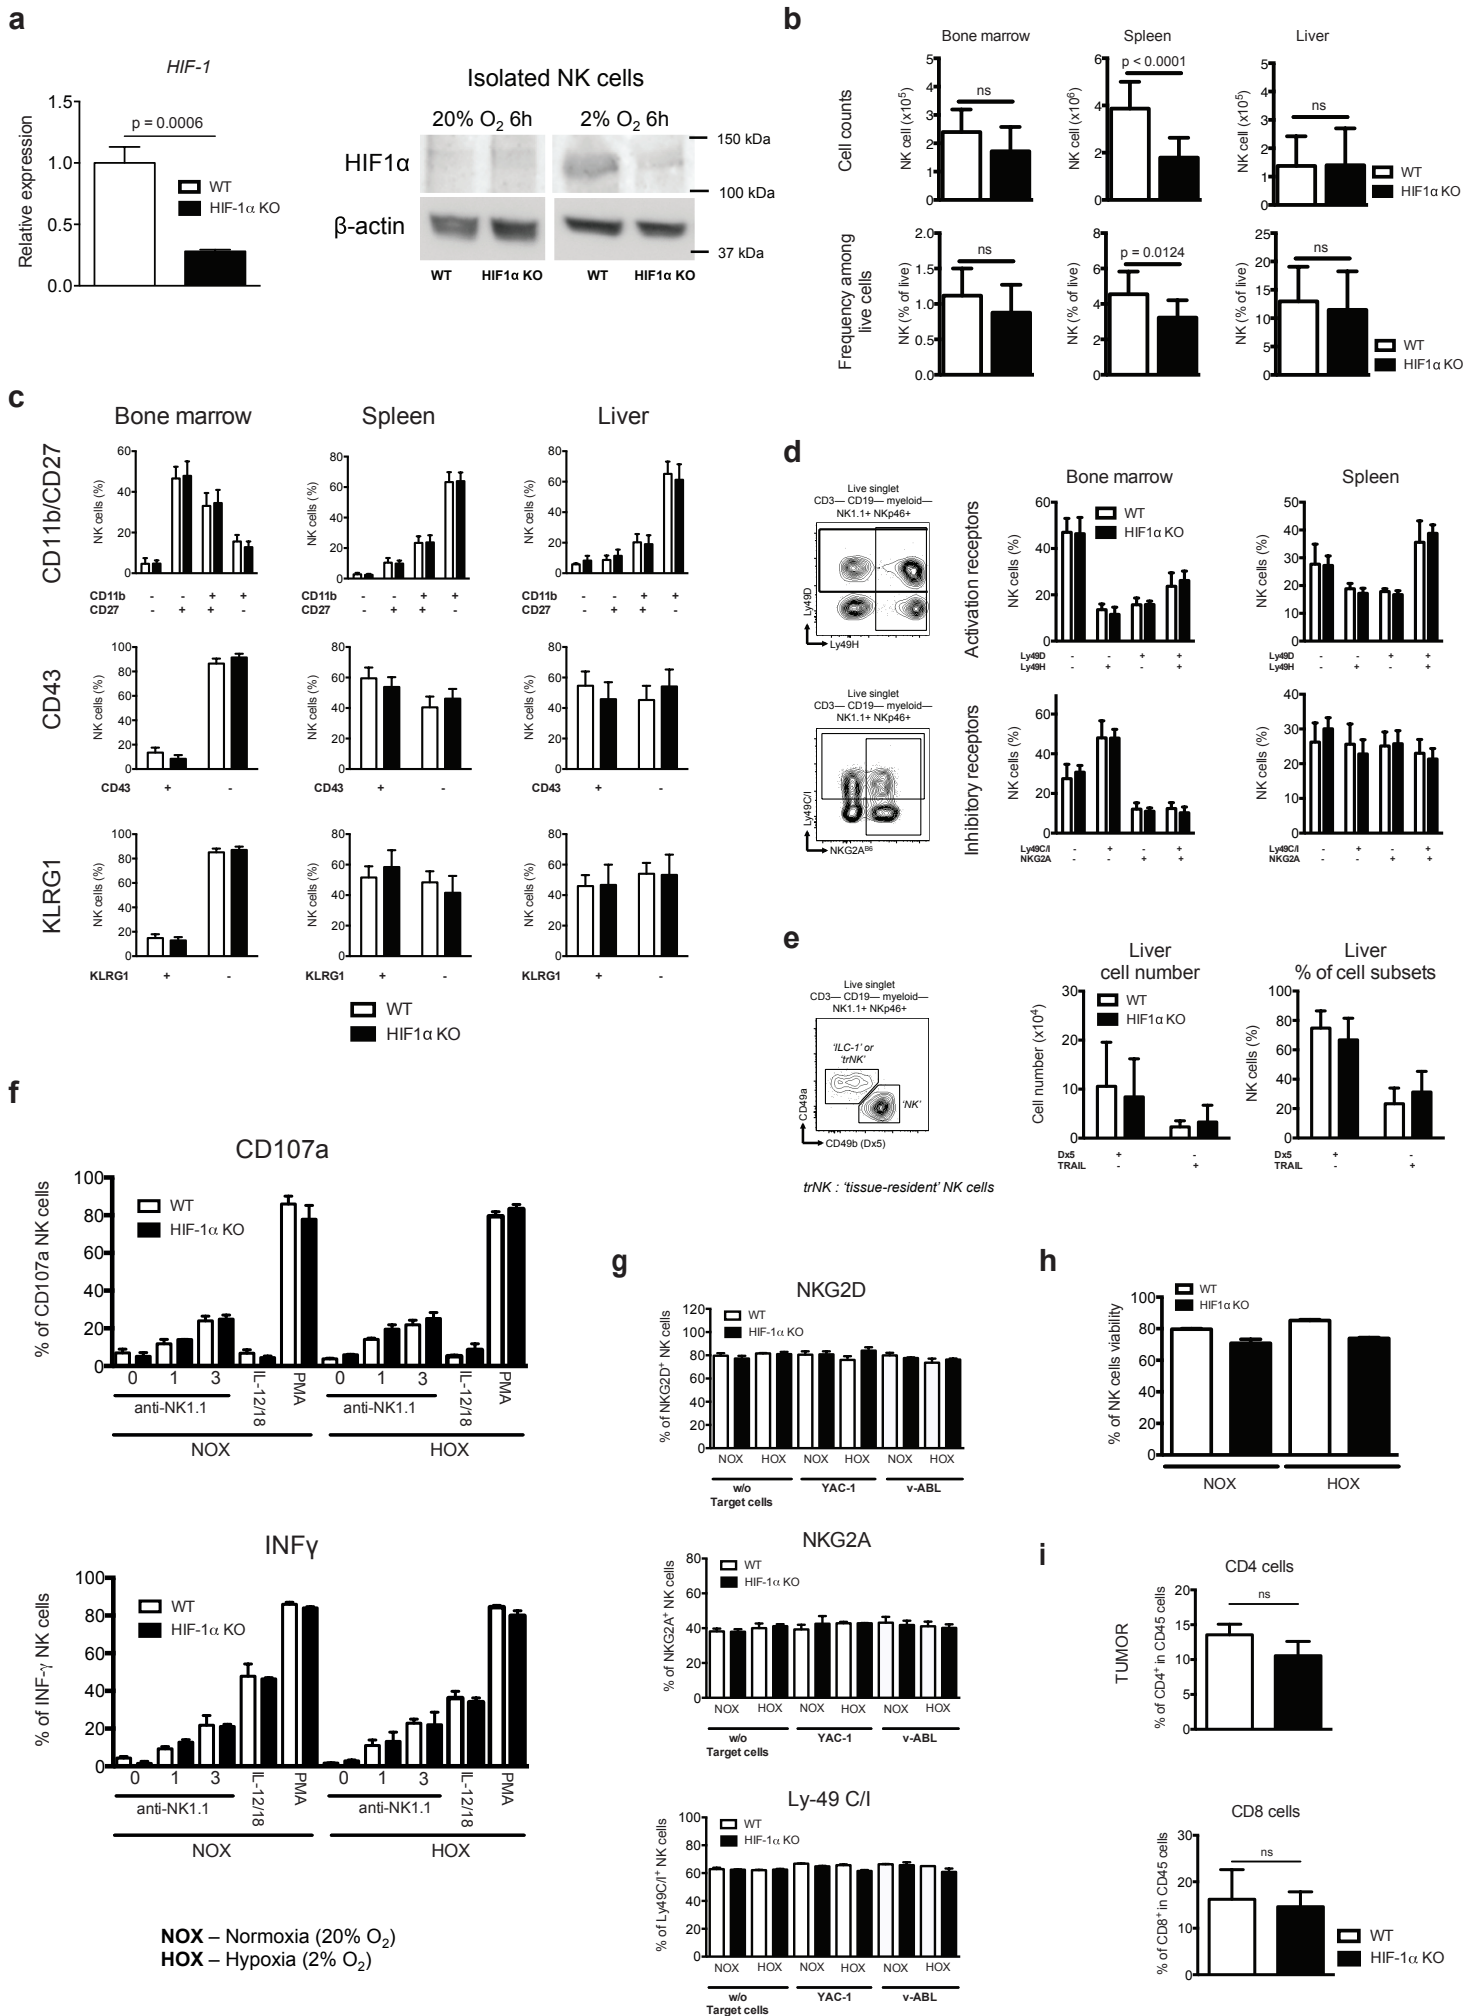

**Supplementary Figure 1.** (a) HIF-1 $\alpha$  expression analysis (left) and HIF-1 $\alpha$  protein level analysis (right) in isolated (splenic) NK cells from WT (n=5) and HIF-1 $\alpha$  KO (n=5) mice after 6h of incubation in normoxia (20% of O<sub>2</sub>) and hypoxia (2% of O<sub>2</sub>). (b) The number and the frequency of NK cells in lymphocytes from WT (n=11) and HIF-1 $\alpha$  KO (n=12) mice in different tissues (bone marrow, spleen, liver). (c) The expression analysis of CD27, CD11b, CD43 and KLRG1 on gated NK cells from WT (n=11) and HIF-1 $\alpha$  KO (n=12) mice in different tissues (bone marrow, spleen, liver). (d) The expression analysis of the NK cell activating and inhibitory receptors Ly49D, Ly49H, Ly49C/I and NKG2AB6 on gated NK cells from WT (n=11) and HIF-1 $\alpha$  KO (n=12) mice in different tissues (bone marrow, spleen). (e) The expression analysis of CD49a and CD49b on gated NK cells from liver from WT (n=11) and HIF-1 $\alpha$  KO (n=12) mice. (f) Splenocytes from WT (n=4) and HIF-1 $\alpha$  KO (n=3) mice were stimulated with ligand mediated activation of the NK1.1 receptor (1-3 $\mu$ g ml<sup>-1</sup>), activating cytokines IL-12/18 (20ng ml<sup>-1</sup>) or unspecific activation by PMA (200ng ml<sup>-1</sup>) /Ionomycin (1 $\mu$ g ml<sup>-1</sup>) under normoxia (NOX – 20% of O<sub>2</sub>) and hypoxia (HOX – 2% of O<sub>2</sub>) for 6 hours in vitro. NK cell degranulation (CD107A+) and IFN- $\gamma$  expression were analysed by flow cytometry. (g) The expression analysis of NK cell activating and inhibitory receptors NKG2D, NKG2A and Ly-49 C/I in WT (n=5) and HIF-1 $\alpha$  KO (n=5) mice. (h) The NK cell viability in WT (n=5) and HIF-1 $\alpha$  KO (n=5) mice. (i) The LLC tumour infiltrating lymphocytes analysis from WT (n=3) and HIF-1 $\alpha$  KO (n=3) mice showing percentages of CD4-, CD8- positive cells among CD45 cells at endpoint. Bars represent mean values; error bars indicate the s.e.m. Statistical significance was determined by an unpaired Student's t-test or one-way analysis of variance, where appropriate. Statistical significance is indicated as \*P<0.05, \*\*P<0.01 and \*\*\*P<0.001.

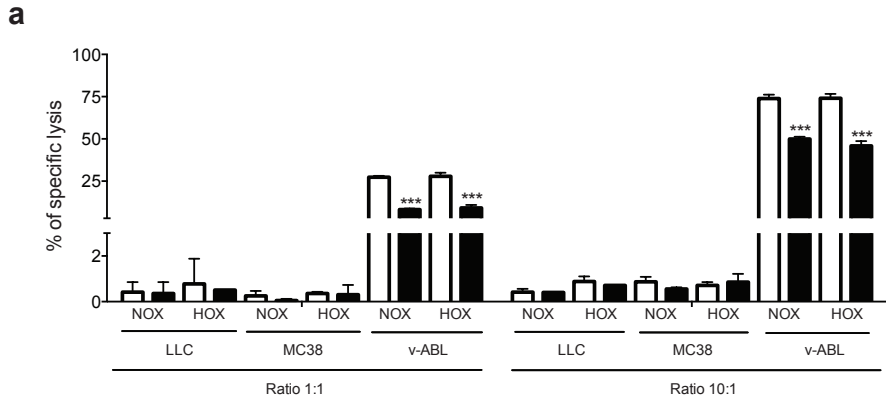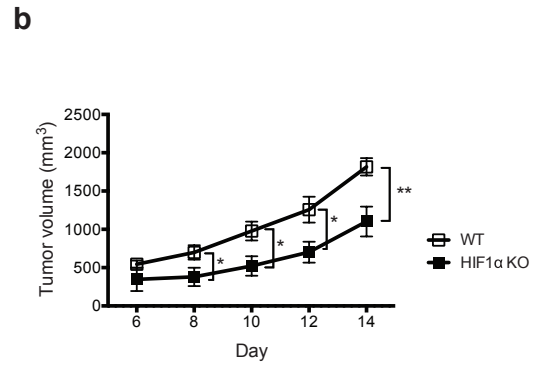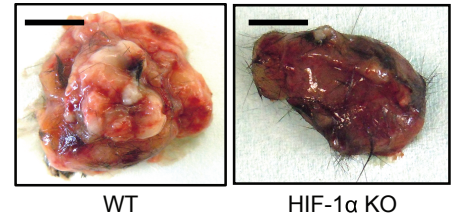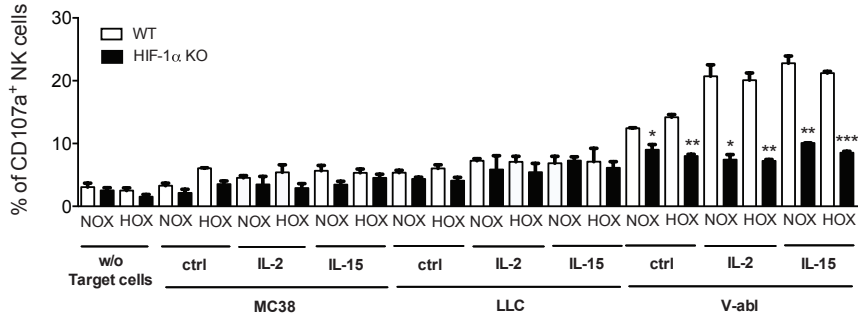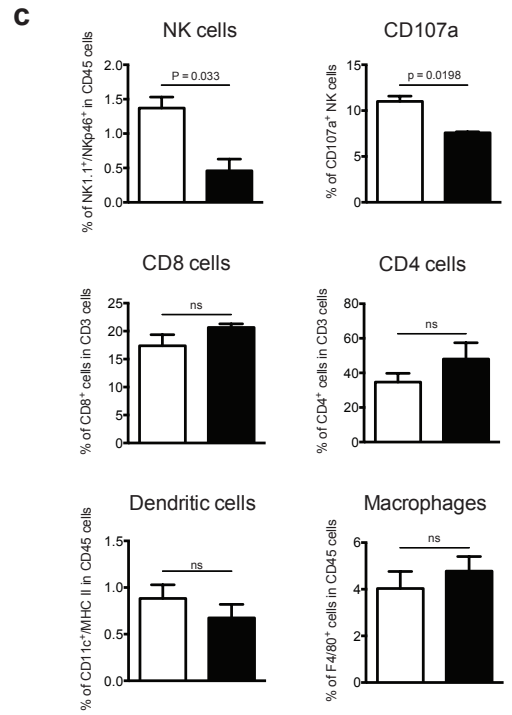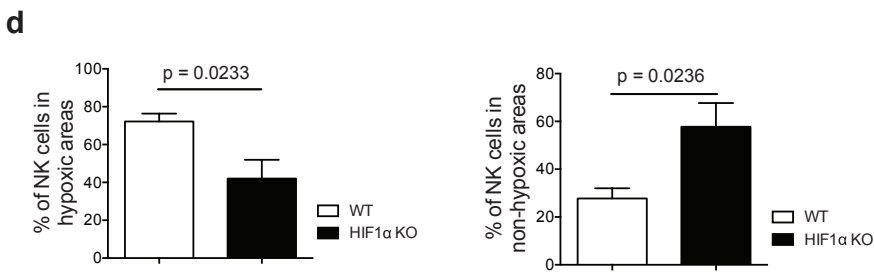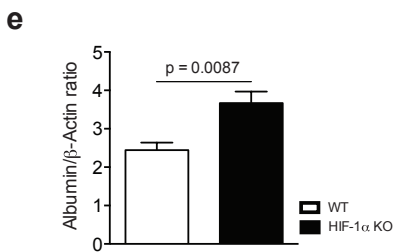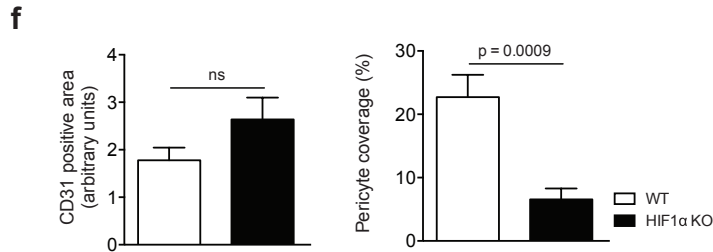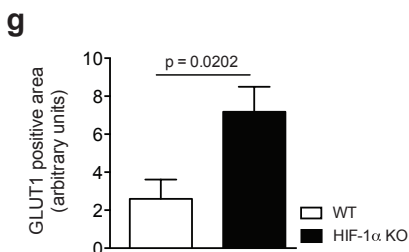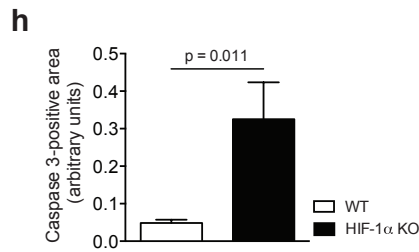

**Supplementary Figure 2.** (a) Top : Cytotoxic assay of purified NK cells from WT (n=5) and HIF-1 $\alpha$  KO mice (n=5) with target cells (MC38, LLC and Vabl lymphoma cells, Ratios E/T 1 :1 and 10 :1) under normoxia (NOX – 20% of O<sub>2</sub>) and hypoxia (HOX – 2% of O<sub>2</sub>) for 6h. Middle and bottom: Splenocytes from WT and HIF-1 $\alpha$  KO mice were stimulated with target cells (MC38, LLC and V-abl lymphoma cells, Ratio E/T 1:1), in absence or presence of rhIL-2 and rmIL15 under normoxia (NOX – 20% of O<sub>2</sub>) and hypoxia (HOX – 2% of O<sub>2</sub>). NK cell degranulation (CD107A+) and INF- $\gamma$  expression were analysed by flow cytometry (n=4 for each group). (b) Tumour volume analysis of LLC isografts injected subcutaneously in WT and HIF-1 $\alpha$  KO mice with representative images at endpoint, day 14 (n=12). Scale bars in macroscopic figures indicate 5 mm. (c) Flow cytometry analysis for NK1.1, NKp46 (for NK cells), CD107a (for NK cell activation state) CD3, CD4, CD8 (for T cells) CD11c, MHCII (for Dendritic cells), F4/80 (for Macrophages) on LLC isografts from WT and HIF-1 $\alpha$  KO mice at endpoint, day 14 (n=5). (d) Quantitative analysis of NK cell localization relative to hypoxic and non-hypoxic areas within the tumour by NKp46 staining and the hypoxia-inducible surrogate marker Glut1 (n=5). (e) Quantitative analysis of intratumoural amounts of albumin for LLC tumours from WT and HIF-1 $\alpha$  KO mice (n=5). (f) Quantitative analysis of CD31-positive endothelial cells (n=9) and pericyte coverage as assessed by  $\alpha$ -SMA/CD31 co-localization (n=9) in LLC tumours. (g) Quantitative analysis of hypoxic tumour areas by Glut1 staining on LLC isografts (n=9). (h) Quantitative analysis of caspase-3 positive areas on LLC isografts (n=7). Statistical significance was determined by an unpaired Student's t-test or one-way analysis of variance, where appropriate. Bars represent mean values; error bars indicate the s.e.m. Statistical significance is indicated as \*P<0.05, \*\*P<0.01 and \*\*\*P<0.001.

**a**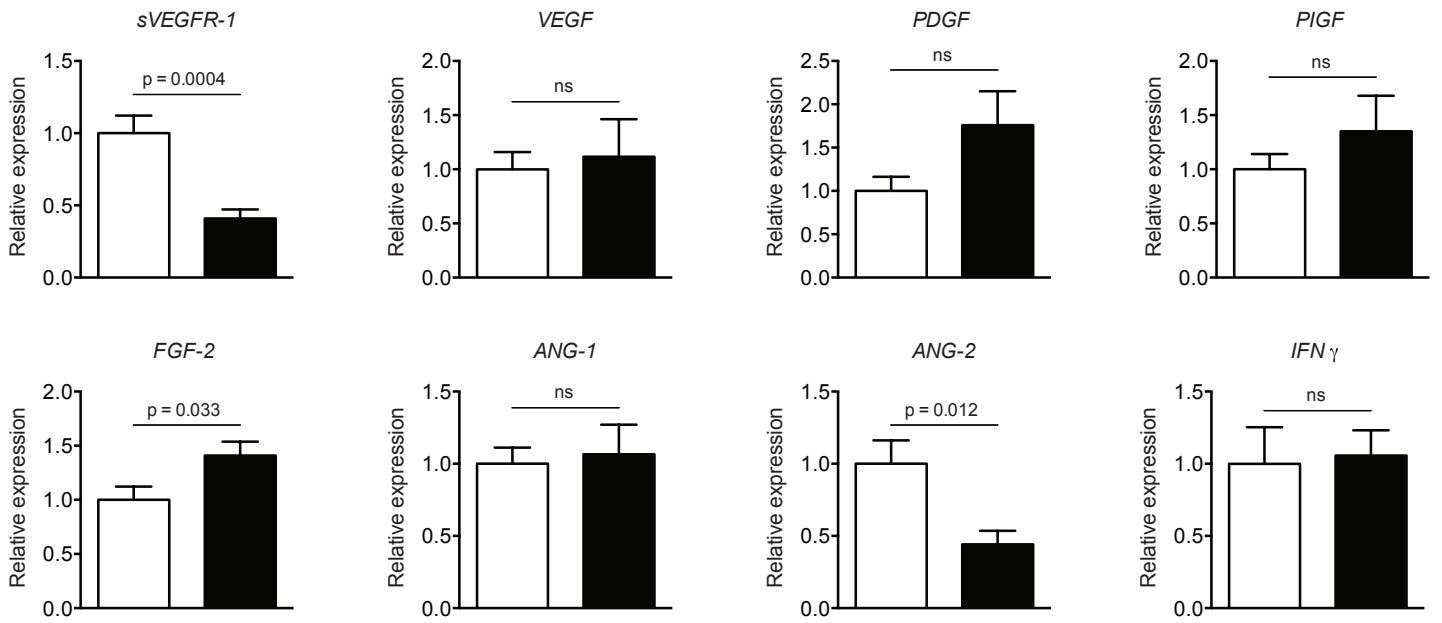**b**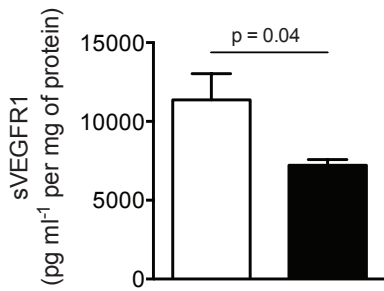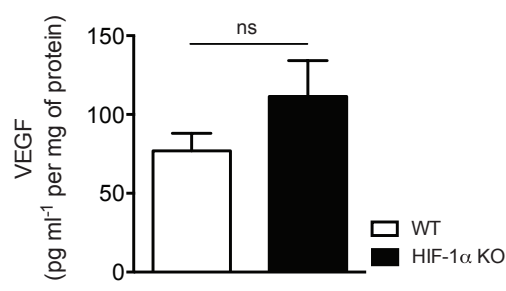**c**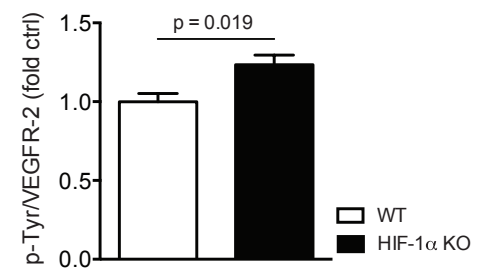**d**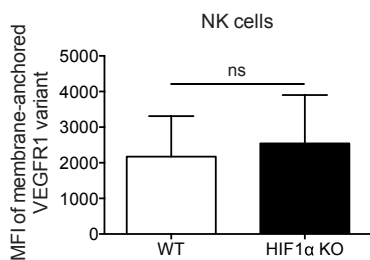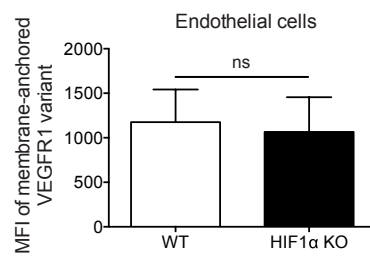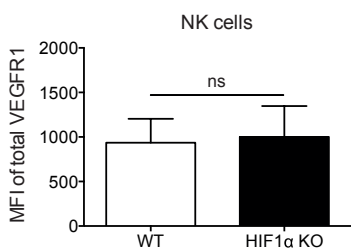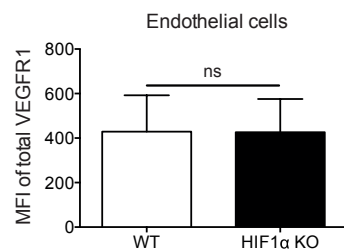

**Supplementary Figure 3.** (a) Gene expression analysis for angiogenic and angiostatic factors (sVEGFR1, VEGF, PDGF, PIGF, FGF-2, ANG-1, ANG-2, INF- $\gamma$ ) in LLC tumours injected subcutaneously in WT and HIF-1 $\alpha$  KO mice at endpoint, day 14 (n=10). (b) Determination of levels of sVEGFR1 and VEGF protein in LLC tumours injected subcutaneously in WT and HIF-1 $\alpha$  KO mice by ELISA at endpoint, day 14 (n=5). (c) Ratio of p-Tyr and VEGFR2 signal intensities as a measure of receptor activation at endpoint, day 14 (n=5). (d) Flow cytometry analysis of membrane-anchored VEGFR1 and total VEGFR1 for NK cells (NK1.1+/NKp46+) and endothelial cells (CD31+/CD45-) on MC38 tumours from WT and HIF-1 $\alpha$  KO mice at endpoint, day 10 (n=15). Bars represent mean values; error bars indicate the s.e.m.. Statistical significance was determined by an unpaired Student's t-test or one-way analysis of variance, where appropriate. Statistical significance is indicated as \*P<0.05, \*\*P<0.01 and \*\*\*P<0.001.

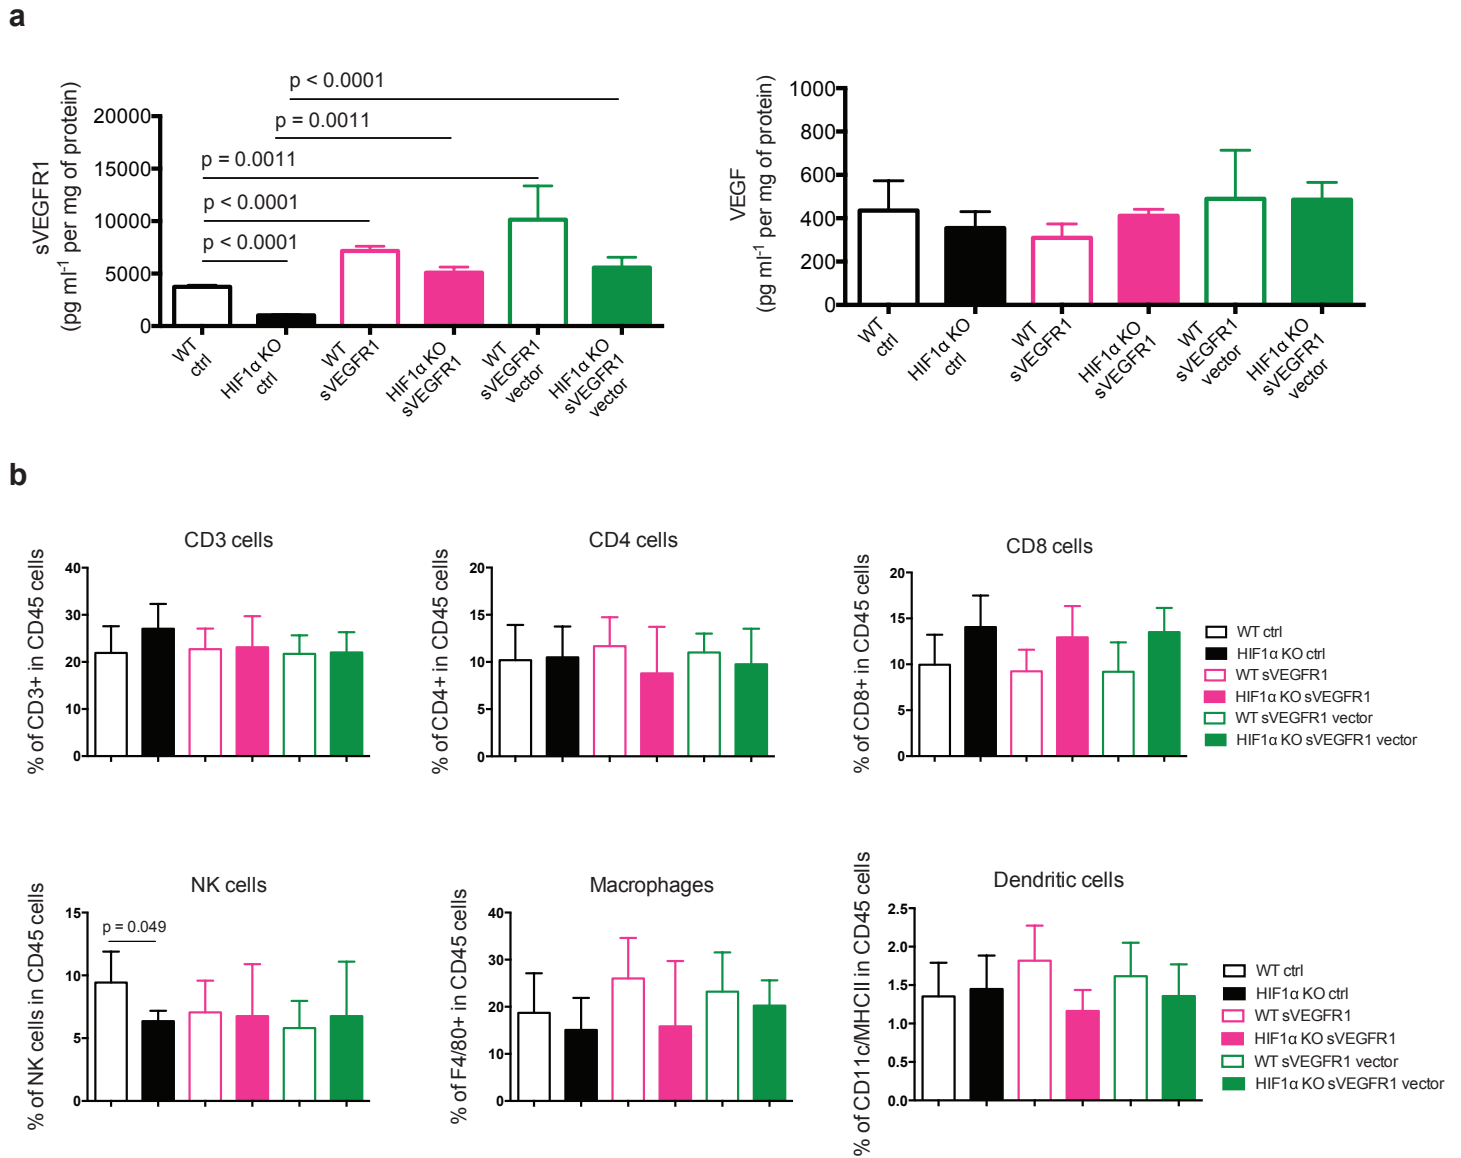

**Supplementary Figure 4.** (a) Determination of levels of sVEGFR1 and VEGF protein in MC38 isografts implanted in WT and HIF-1 $\alpha$  KO mice after intratumoural injection with recombinant sVEGFR1 protein or sVEGFR1 vector at day 4, 6, 8 and 12 by ELISA at endpoint, day 14. Control mice received intratumoural injections of 100  $\mu$ l PBS or ctrl vector. (b) Flow cytometry analysis for CD3, CD4, CD8 (for T cells), NK1.1, NKp46 (for NK cells), F4/80 (for Macrophages), CD11c, MHCII (for Dendritic cells) on MC38 isografts from WT and HIF-1 $\alpha$  KO mice after intratumoural injection with recombinant sVEGFR1 protein or sVEGFR1 vector as previously described, at endpoint day 14; (n=10 for ctrl group; n=5 for sVEGFR1 protein injection group; n=3 for sFLT1 vector injection group). Student's t-test was performed to calculate P value. Bars represent mean values; error bars indicate the s.e.m. Statistical significance is indicated as \*P<0.05, \*\*P<0.01 and \*\*\*P<0.001.

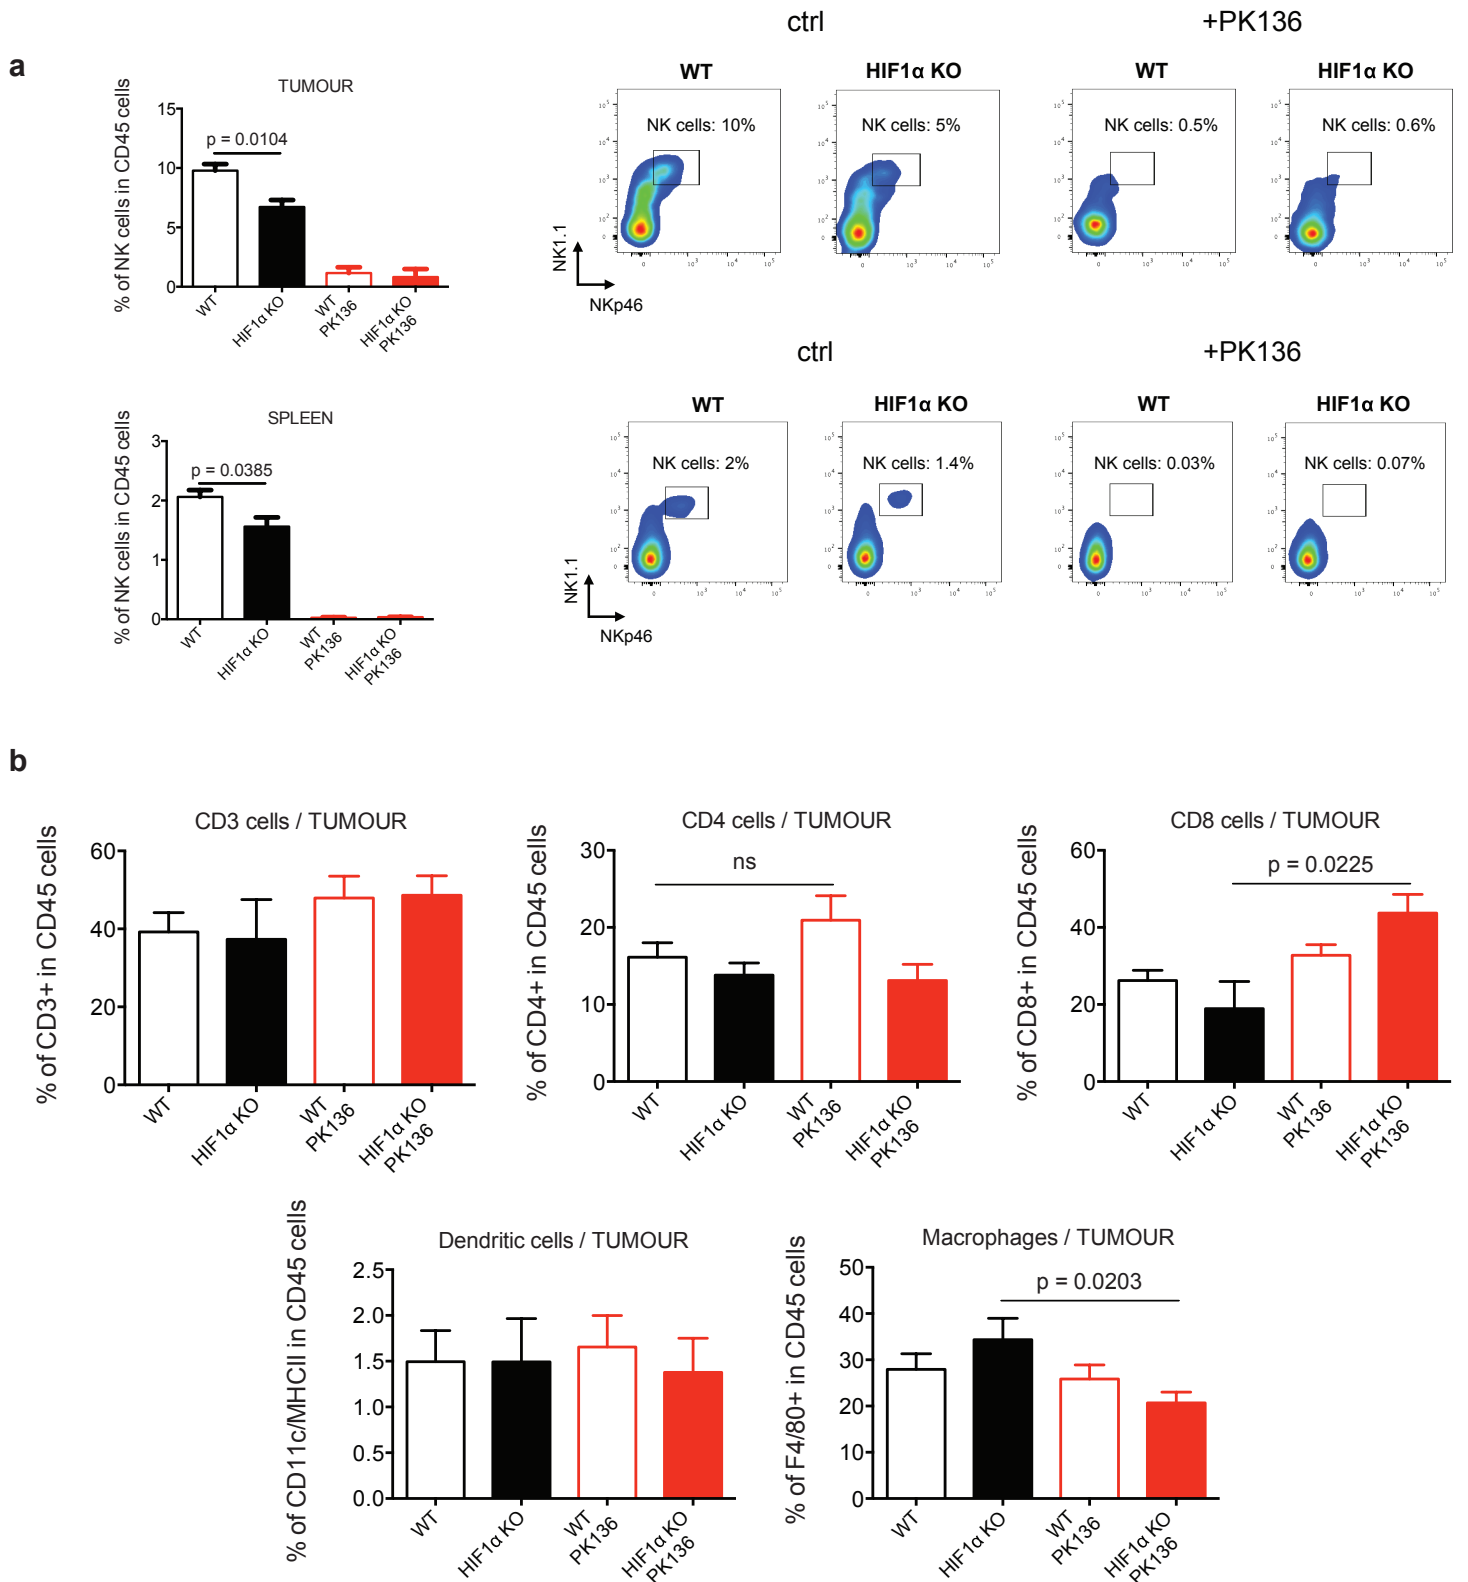

**Supplementary Figure 5.** (a) Flow cytometry analysis of spleen and tumour samples for NK1.1, NKp46 (for NK cells) on PK136 depleted-MC38 isografts implanted in WT and HIF-1 $\alpha$  KO mice with representative dot-plots (b) Flow cytometry analysis for CD3, CD4, CD8 (for T cells), CD11c, MHCII (for Dendritic cells), F4/80 (for Macrophages) on MC38 isografts implanted in WT and HIF-1 $\alpha$  KO mice treated as previously described ; (n=9 for WT group ; n=5 for HIF-1 $\alpha$  KO group ; n=8 for PK136 depleted WT group ; n=7 for PK136 depleted HIF-1 $\alpha$  KO group). Student's t-test was performed to calculate P value. Bars represent mean values; error bars indicate the s.e.m. Statistical significance is indicated as \* $P < 0.05$ , \*\* $P < 0.01$  and \*\*\* $P < 0.001$ .



a

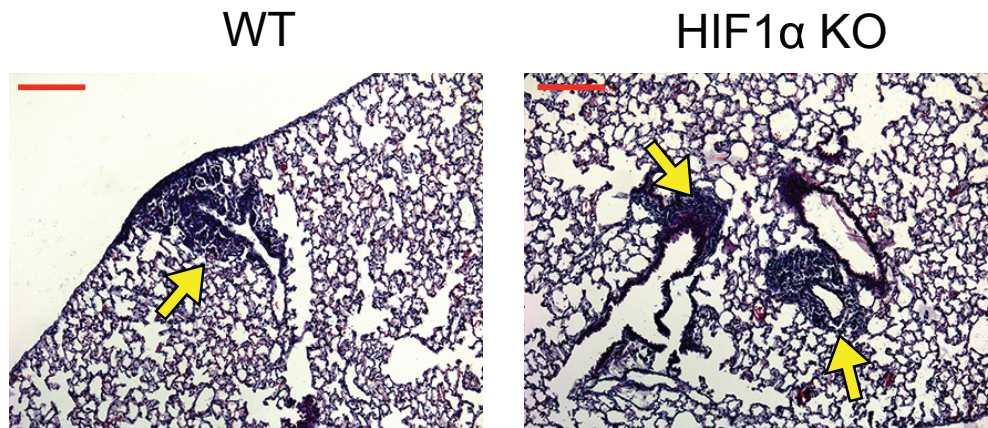

b

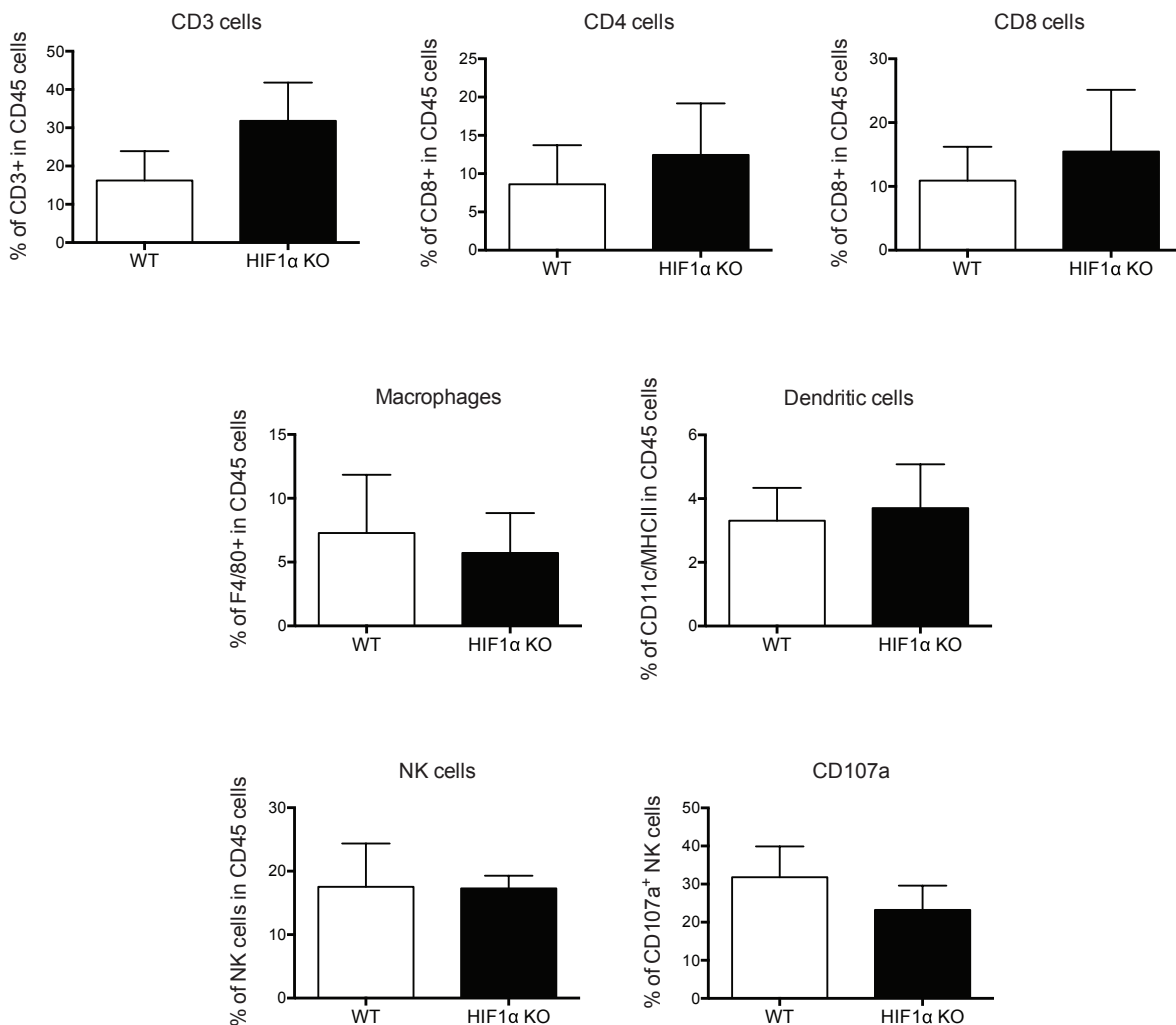

**Supplementary Figure 6.** (a) Representative lung H&E sections of metastases from LLC tumour-bearing wild-type (WT) and HIF-1 $\alpha$  KO mice. Arrows point to metastatic foci. (b) Flow cytometry analysis for CD3, CD4, CD8 (for T cells), F4/80 (for Macrophages), CD11c, MHCII (for Dendritic cells), NK1.1, NKp46 (for NK cells), CD107a (for NK cell activation state) on B16F10 melanoma isografts from WT and HIF-1 $\alpha$  KO mice at endpoint, day 18 (n=10 for WT group ; n=6 for HIF-1 $\alpha$  KO group). Bars represent mean values; error bars indicate the s.e.m.; statistical significance was determined by an unpaired Student's t-test. Statistical significance is indicated as \*P<0.05, \*\*P<0.01 and \*\*\*P<0.001. Scale bar, 100  $\mu$ m.

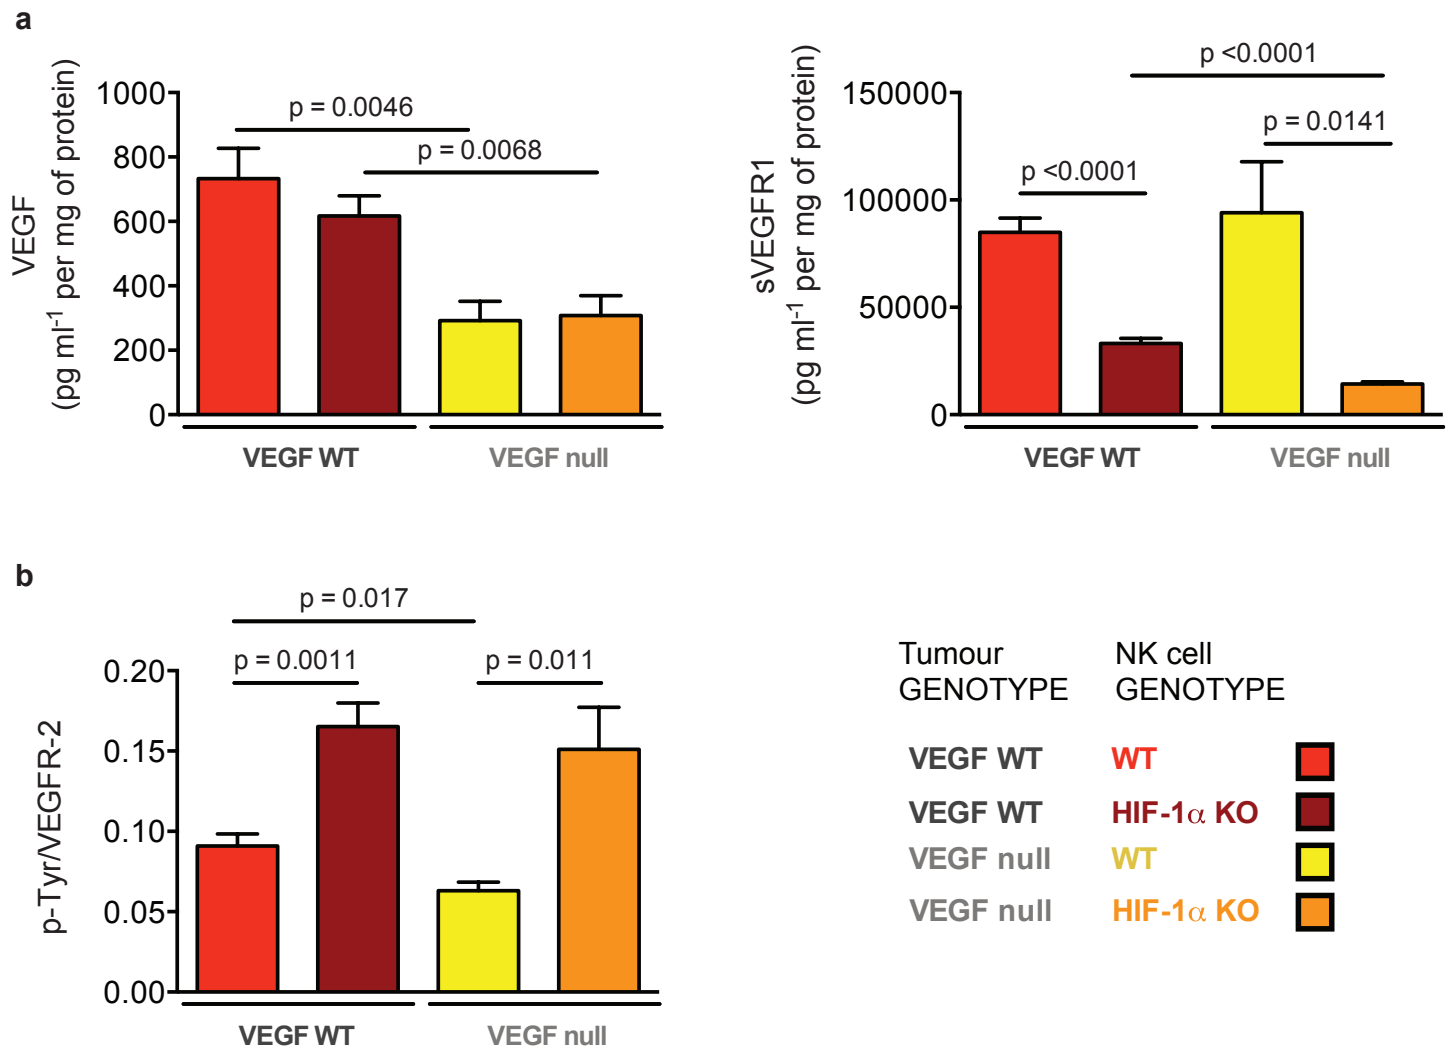

**Supplementary Figure 7.** (a) Determination of levels of VEGF and sVEGFR1 protein in VEGF WT and VEGF null fibrosarcoma isografts implanted in WT and HIF-1 $\alpha$  KO mice by ELISA at endpoint, day 10 (n=6). (b) Ratio of p-Tyr and VEGFR2 signal intensities as a measure of receptor activation at endpoint, day 10 (n=6). Student's t-test was performed to calculate P value. Bars represent mean values; error bars indicate the s.e.m. Statistical significance is indicated as \*P<0.05, \*\*P<0.01 and \*\*\*P<0.001.

a

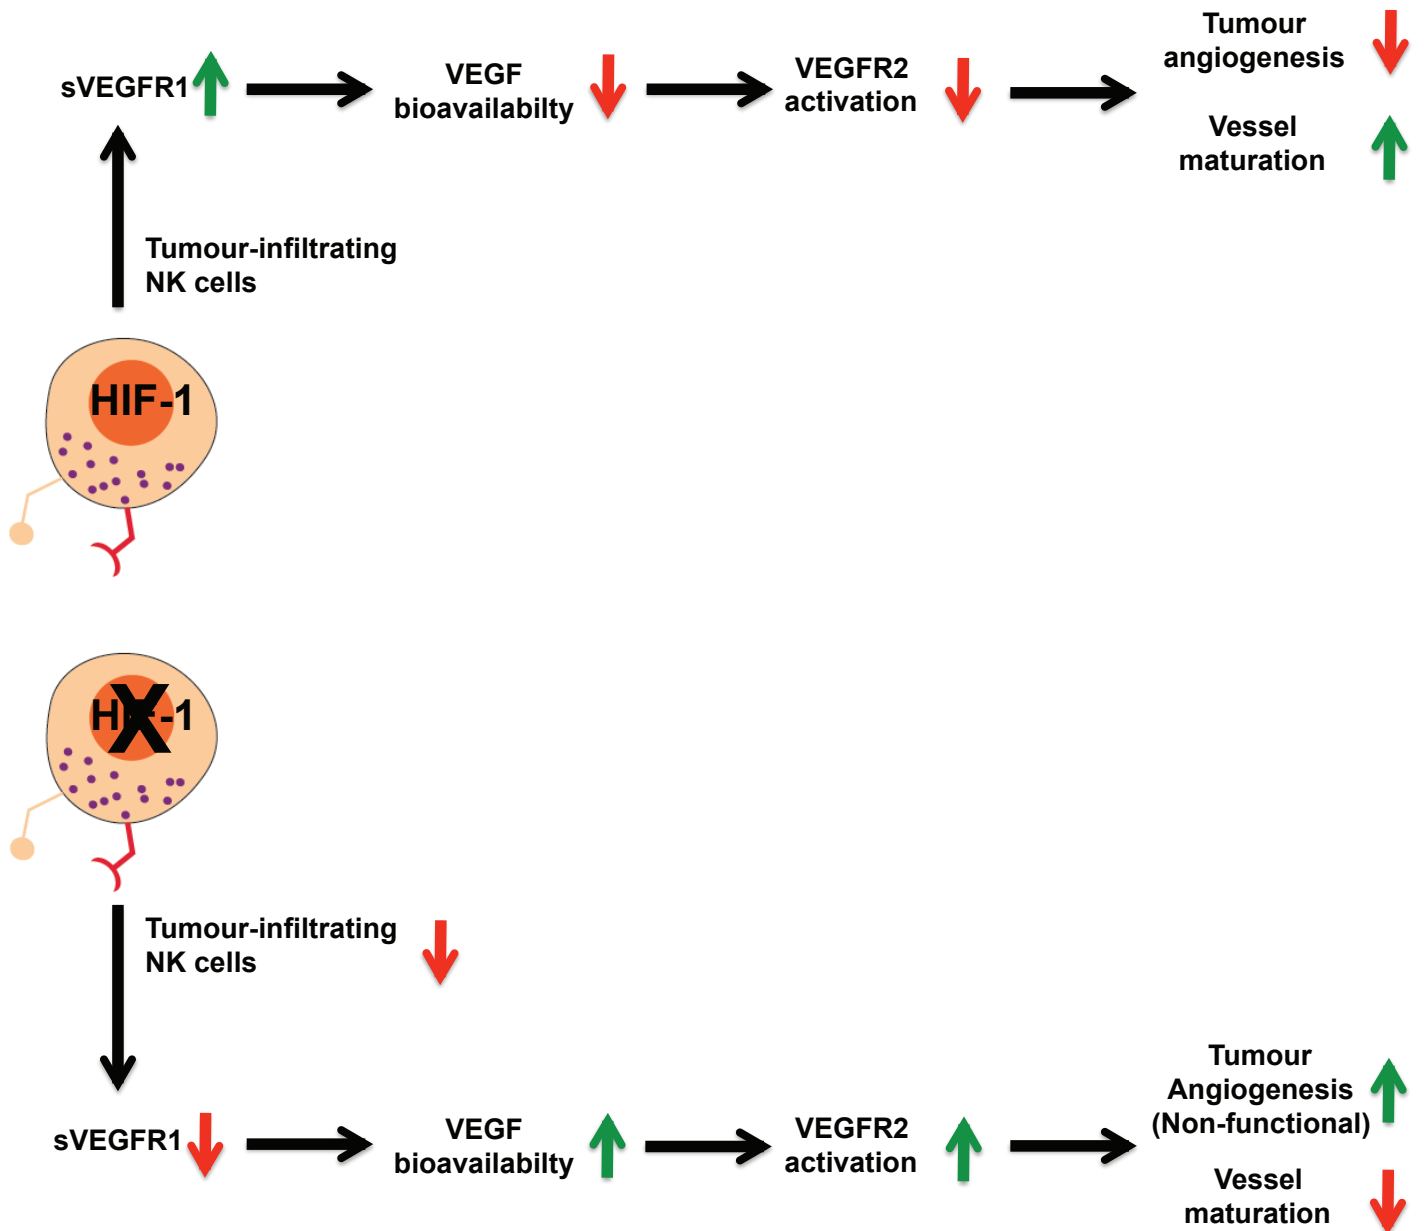

**Supplementary Figure 8.** (a) Graphical summary and proposed mechanism: NK cells are an important source of sVEGFR1, thereby negatively regulating VEGF bioavailability and pathological angiogenesis in a HIF-1 $\alpha$ -dependent manner (green arrows – increase ; red arrows – decrease).

**a**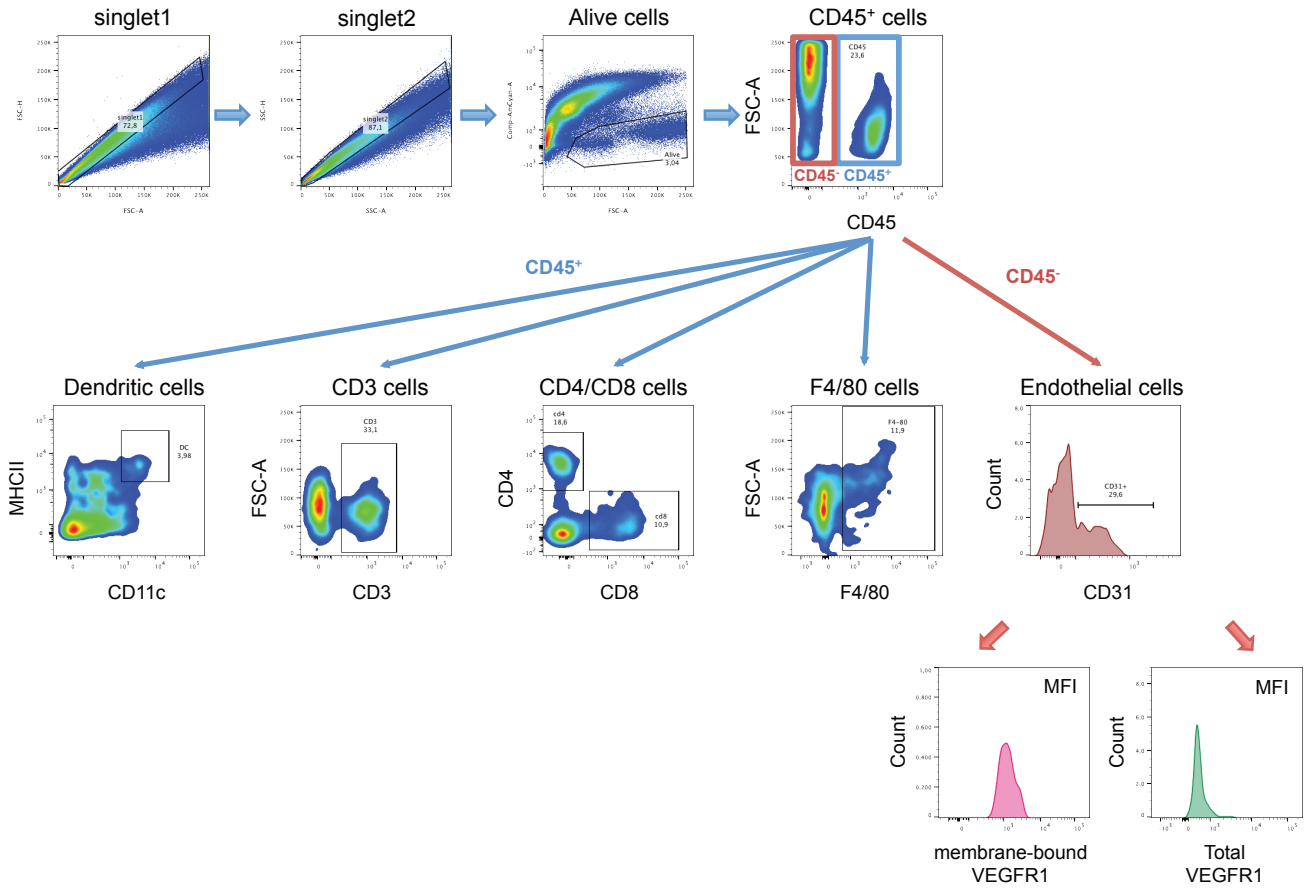**b**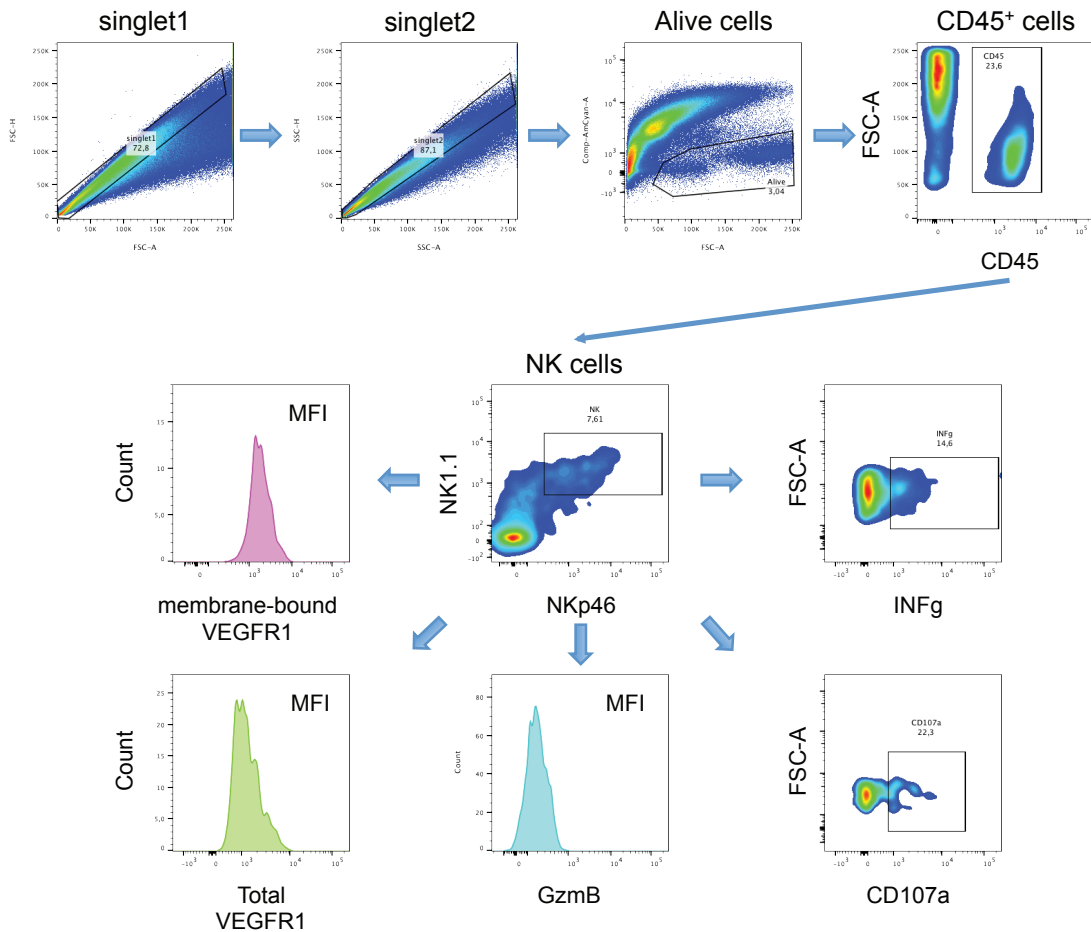

**Supplementary Figure 9.** Gating strategy: The single cell leukocyte population was selected by FSC-H versus FSC-A and SSC-H versus SSC-A. The leukocyte population was further analysed for their uptake of the Live/Dead Aqua stain to determine live versus dead cells and for the expression of CD45. (a) Then CD45<sup>+</sup> cells were classified as dendritic cells by co-expression of CD11c and MHCII, T cells by CD3 expression, T helper cells by CD4 expression and T cytotoxic cells by CD8 expression, macrophage population by F4/80 expression. Endothelial cells were classified as CD45<sup>-</sup> and CD31 positive cells and they were analysed for membrane-bound VEGFR1 and total VEGFR1. (b) Then CD45<sup>+</sup> cells were classified as NK cells by co-expression of NKp46 and NK1.1 and they were analysed for membrane-bound VEGFR1, total VEGFR1, granzyme B, CD107a and interferon  $\gamma$ .

**a**

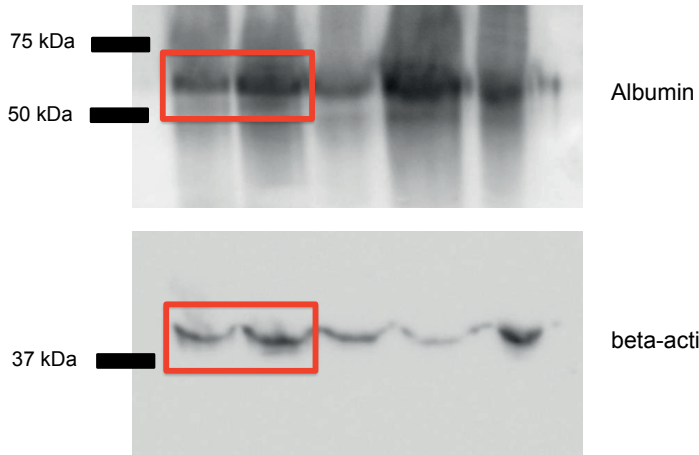

**b**

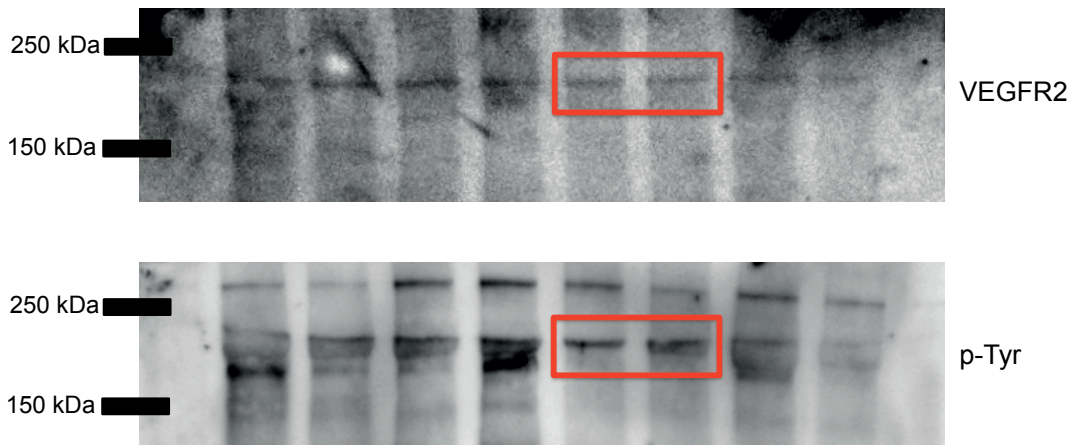

**c**

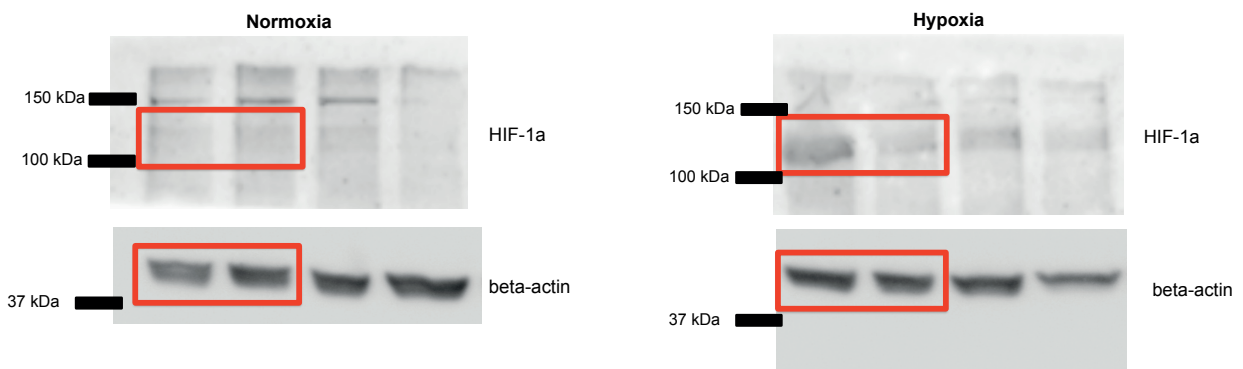

**Supplementary Figure 10.** Scans of Western blots shown in Figures 2c (a), 3b (b) and Supplemental Figure 1a (c). Molecular weight markers are indicated. Red boxes highlight the lanes that are displayed in the corresponding Figures.
